# Supplementary material for: Purkinje cell neurotransmission patterns cerebellar basket cells into zonal modules defined by distinct pinceau sizes
Source: eLife. 2020 Sep 29;9:e55569. doi: 10.7554/eLife.55569 (PMC7561353; doi:10.7554/eLife.55569)
Supplement: Figure 2—source data 1. [file elife-55569-fig2-data1.xlsx]

## Sheet: Figure 2
FIGURE 2 SOURCE DATA
Panel I
ZebrinII Positive Zone					ZebrinII Negative Zone
ZebrinII Zone Identity	Genotype	Total Pinceaux Area per 100μm of Zone (µm²)	N (animals)		ZebrinII Zone Identity	Genotype	Total Pinceaux Area per 100μm of Zone (µm²)	N (animals)
Positive	Control (C57BL/6J)	238.65	6		Negative	Control (C57BL/6J)	495.52	6
Positive	Control (C57BL/6J)	114.214	6		Negative	Control (C57BL/6J)	339.976	6
Positive	Control (C57BL/6J)	117.679	6		Negative	Control (C57BL/6J)	399.527	6
Positive	Control (C57BL/6J)	131.991	6		Negative	Control (C57BL/6J)	275.091	6
Positive	Control (C57BL/6J)	55.552	6		Negative	Control (C57BL/6J)	318.199	6
Positive	Control (C57BL/6J)	113.325	6		Negative	Control (C57BL/6J)	223.984	6
Positive	Control (C57BL/6J)	114.658	6		Negative	Control (C57BL/6J)	355.068	6
Positive	Control (C57BL/6J)	138.657	6		Negative	Control (C57BL/6J)	312.867	6
Positive	Control (C57BL/6J)	133.768	6		Negative	Control (C57BL/6J)	281.758	6
Positive	Control (C57BL/6J)	180.876	6		Negative	Control (C57BL/6J)	478.663	6
Positive	Control (C57BL/6J)	136.435	6		Negative	Control (C57BL/6J)	358.197	6
Positive	Control (C57BL/6J)	179.543	6		Negative	Control (C57BL/6J)	350.667	6
Positive	Control (C57BL/6J)	104.444	6		Negative	Control (C57BL/6J)	371.556	6
Positive	Control (C57BL/6J)	88	6		Negative	Control (C57BL/6J)	420.444	6
Positive	Control (C57BL/6J)	132.444	6		Negative	Control (C57BL/6J)	439.556	6
Positive	Control (C57BL/6J)	146.222	6		Negative	Control (C57BL/6J)	345.778	6
Positive	Control (C57BL/6J)	89.333	6		Negative	Control (C57BL/6J)	507.111	6
Positive	Control (C57BL/6J)	111.111	6		Negative	Control (C57BL/6J)	254.667	6
Positive	Control (C57BL/6J)	54.667	6		Negative	Control (C57BL/6J)	409.333	6
Positive	Control (C57BL/6J)	212	6		Negative	Control (C57BL/6J)	566.667	6
Positive	Control (C57BL/6J)	66.222	6		Negative	Control (C57BL/6J)	360	6
Positive	Control (C57BL/6J)	175.556	6		Negative	Control (C57BL/6J)	390.667	6
Positive	Control (C57BL/6J)	129.778	6		Negative	Control (C57BL/6J)	548	6
Positive	Control (C57BL/6J)	184.889	6		Negative	Control (C57BL/6J)	420.889	6
Positive	Control (C57BL/6J)	148	6		Negative	Control (C57BL/6J)	426.222	6
Positive	Control (C57BL/6J)	119.111	6		Negative	Control (C57BL/6J)	320.889
Panel J
ZebrinII Positive Pinceau (SMALL)
ZebrinII Zone Identity	Genotype	Area of ROI in Pixels (1µm²)	Mean Intensity	Raw Density	Integrated Density (Raw Density / Area)	Background Mean Intensity	Mean Total Background Intensity	CTCF Value*	N (animals)
Positive	Control (C57BL/6J)	9	64.884	731	81.2222	0.444	0.585	75.9572	6
Positive	Control (C57BL/6J)	9	77.333	712	79.1111	0	0.585	73.8461	6
Positive	Control (C57BL/6J)	9	65.556	700	77.7778	1.312	0.585	72.5128	6
Positive	Control (C57BL/6J)	9	76.333	711	79	0.062	0.583	73.753	6
Positive	Control (C57BL/6J)	9	75.667	679	75.4444	0.875	0.583	70.1974	6
Positive	Control (C57BL/6J)	9	85.444	708	78.6667	0.812	0.583	73.4197	6
Positive	Control (C57BL/6J)	9	74.111	649	72.1111	0.438	0.377	68.7181	6
Positive	Control (C57BL/6J)	9	80.111	759	84.3333	0.25	0.377	80.9403	6
Positive	Control (C57BL/6J)	9	79.778	726	80.6667	0.444	0.377	77.2737	6
Positive	Control (C57BL/6J)	9	89	709	78.7778	0.062	0.313	75.9608	6
Positive	Control (C57BL/6J)	9	75.667	667	74.1111	0.688	0.313	71.2941	6
Positive	Control (C57BL/6J)	9	84.444	682	75.7778	0.188	0.313	72.9608	6
Panel J Con't
ZebrinII Negative Pinceau (LARGE)
ZebrinII Zone Identity	Genotype	Area of ROI in Pixels (1µm²)	Mean Intensity	Raw Density	Integrated Density (Raw Density / Area)	Background Mean Intensity	Mean Total Background Intensity	CTCF Value*	N (animals)
Negative	Control (C57BL/6J)	9	69.556	693	77	0.444	0.585	71.735	6
Negative	Control (C57BL/6J)	9	63.662	665	73.8889	0	0.585	68.6239	6
Negative	Control (C57BL/6J)	9	76.444	701	77.8889	1.312	0.585	72.6239	6
Negative	Control (C57BL/6J)	9	79.217	722	80.2222	0.062	0.583	74.9752	6
Negative	Control (C57BL/6J)	9	73	747	83	0.875	0.583	77.753	6
Negative	Control (C57BL/6J)	9	86	647	71.8889	0.812	0.583	66.6419	6
Negative	Control (C57BL/6J)	9	81.667	700	77.7778	0.438	0.377	74.3848	6
Negative	Control (C57BL/6J)	9	81.889	744	82.6667	0.25	0.377	79.2737	6
Negative	Control (C57BL/6J)	9	80.778	692	76.8889	0.444	0.377	73.4959	6
Negative	Control (C57BL/6J)	9	88.778	700	77.7778	0.062	0.313	74.9608	6
Negative	Control (C57BL/6J)	9	75.556	667	74.1111	0.688	0.313	71.2941	6
Negative	Control (C57BL/6J)	9	79.222	702	78	0.188	0.313	75.183	6
*Forumla for Corrected Total Cell Fluorescence (CTCF) value: CTCF = Integrated Density – (Area of ROI × Mean Fluorescence of Background Readings)
