# Supplementary material for: Purkinje cell neurotransmission patterns cerebellar basket cells into zonal modules defined by distinct pinceau sizes
Source: eLife. 2020 Sep 29;9:e55569. doi: 10.7554/eLife.55569 (PMC7561353; doi:10.7554/eLife.55569)
Supplement: Figure 4—source data 1. [file elife-55569-fig4-data1.xlsx]

## Sheet: Figure 2
FIGURE 4 SOURCE DATA
Panel J
NFH Positive Zone							NFH Negative Zone
NFH Zone Identity	Marker	Genotype	Total Pinceaux Area per 100μm of Zone (µm²)	N (animals)	Lobule		NFH Zone Identity	Marker	Genotype	Total Pinceaux Area per 100μm of Zone (µm²)	N (animals)	Lobule
Positive	NFH	Control (C57BL/6J)	509.297	6	9		Negative	NFH	Control (C57BL/6J)	110.659	6	9
Positive	NFH	Control (C57BL/6J)	407.082	6	9		Negative	NFH	Control (C57BL/6J)	87.105	6	9
Positive	NFH	Control (C57BL/6J)	468.855	6	9		Negative	NFH	Control (C57BL/6J)	132.879	6	8
Positive	NFH	Control (C57BL/6J)	388.417	6	8		Negative	NFH	Control (C57BL/6J)	188.875	6	8
Positive	NFH	Control (C57BL/6J)	490.643	6	8		Negative	NFH	Control (C57BL/6J)	105.326	6	8
Positive	NFH	Control (C57BL/6J)	298.201	6	8		Negative	NFH	Control (C57BL/6J)	135.101	6	8
Positive	NFH	Control (C57BL/6J)	409.749	6	8		Negative	NFH	Control (C57BL/6J)	193.764	6	8
Positive	NFH	Control (C57BL/6J)	352.864	6	8		Negative	NFH	Control (C57BL/6J)	155.989	6	8
Positive	NFH	Control (C57BL/6J)	345.753	6	8		Negative	NFH	Control (C57BL/6J)	136.435	6	8
Positive	NFH	Control (C57BL/6J)	590.62	6	7		Negative	NFH	Control (C57BL/6J)	201.319	6	7
Positive	NFH	Control (C57BL/6J)	552.849	6	7		Negative	NFH	Control (C57BL/6J)	156.878	6	7
Positive	NFH	Control (C57BL/6J)	271.996	6	7		Negative	NFH	Control (C57BL/6J)	216.429	6	7
Positive	NFH	Control (C57BL/6J)	519.074	6	7		Negative	NFH	Control (C57BL/6J)	99.993	6	7
Positive	HCN1	Control (C57BL/6J)	500.409	6	9		Negative	HCN1	Control (C57BL/6J)	114.658	6	9
Positive	HCN1	Control (C57BL/6J)	420.859	6	9		Negative	HCN1	Control (C57BL/6J)	84.438	6	9
Positive	HCN1	Control (C57BL/6J)	472.411	6	9		Negative	HCN1	Control (C57BL/6J)	135.546	6	8
Positive	HCN1	Control (C57BL/6J)	380.417	6	8		Negative	HCN1	Control (C57BL/6J)	194.653	6	8
Positive	HCN1	Control (C57BL/6J)	471.007	6	8		Negative	HCN1	Control (C57BL/6J)	101.771	6	8
Positive	HCN1	Control (C57BL/6J)	297.312	6	8		Negative	HCN1	Control (C57BL/6J)	131.102	6	8
Positive	HCN1	Control (C57BL/6J)	415.081	6	8		Negative	HCN1	Control (C57BL/6J)	197.764	6	8
Positive	HCN1	Control (C57BL/6J)	343.087	6	8		Negative	HCN1	Control (C57BL/6J)	159.989	6	8
Positive	HCN1	Control (C57BL/6J)	345.309	6	8		Negative	HCN1	Control (C57BL/6J)	143.101	6	8
Positive	HCN1	Control (C57BL/6J)	581.736	6	7		Negative	HCN1	Control (C57BL/6J)	200.43	6	7
Positive	HCN1	Control (C57BL/6J)	548.405	6	7		Negative	HCN1	Control (C57BL/6J)	133.768	6	7
Positive	HCN1	Control (C57BL/6J)	486.632	6	7		Negative	HCN1	Control (C57BL/6J)	218.651	6	7
Positive	HCN1	Control (C57BL/6J)	517.296	6	7		Negative	HCN1	Control (C57BL/6J)	108.437	6	7
