# Supplementary material for: Purkinje cell neurotransmission patterns cerebellar basket cells into zonal modules defined by distinct pinceau sizes
Source: eLife. 2020 Sep 29;9:e55569. doi: 10.7554/eLife.55569 (PMC7561353; doi:10.7554/eLife.55569)
Supplement: Figure 6—source data 1. [file elife-55569-fig6-data1.xlsx]

## Sheet: Figure 7
FIGURE 7 SOURCE DATA
Panel F
PLCß4 Positive Zone					PLCß4 Negative Zone
PLCß4?	Genotype	Total Pinceaux Area per 100μm of Zone (µm²)	N (animals)		PLCß4?	Genotype	Total Pinceaux Area per 100μm of Zone (µm²)	N (animals)
Positive	Ascl1CreERT2;Tauflox-stop-mGFP-lacZ	542.406	4		Negative	Ascl1CreERT2;Tauflox-stop-mGFP-lacZ	233.317	4
Positive	Ascl1CreERT2;Tauflox-stop-mGFP-lacZ	766.612	4		Negative	Ascl1CreERT2;Tauflox-stop-mGFP-lacZ	215.429	4
Positive	Ascl1CreERT2;Tauflox-stop-mGFP-lacZ	697	4		Negative	Ascl1CreERT2;Tauflox-stop-mGFP-lacZ	107.215	4
Positive	Ascl1CreERT2;Tauflox-stop-mGFP-lacZ	648.889	4		Negative	Ascl1CreERT2;Tauflox-stop-mGFP-lacZ	345	4
Positive	Ascl1CreERT2;Tauflox-stop-mGFP-lacZ	312.566	4		Negative	Ascl1CreERT2;Tauflox-stop-mGFP-lacZ	197.222	4
Positive	Ascl1CreERT2;Tauflox-stop-mGFP-lacZ	555.183	4		Negative	Ascl1CreERT2;Tauflox-stop-mGFP-lacZ	196.111	4
Positive	Ascl1CreERT2;Tauflox-stop-mGFP-lacZ	442.222	4		Negative	Ascl1CreERT2;Tauflox-stop-mGFP-lacZ	80.444	4
Positive	Ascl1CreERT2;Tauflox-stop-mGFP-lacZ	548.889	4		Negative	Ascl1CreERT2;Tauflox-stop-mGFP-lacZ	89.778	4
Positive	Ascl1CreERT2;Tauflox-stop-mGFP-lacZ	503.556	4		Negative	Ascl1CreERT2;Tauflox-stop-mGFP-lacZ	112.444	4
Positive	Ascl1CreERT2;Tauflox-stop-mGFP-lacZ	401.333	4		Negative	Ascl1CreERT2;Tauflox-stop-mGFP-lacZ	83.111	4
Positive	Ascl1CreERT2;Tauflox-stop-mGFP-lacZ	536.889	4		Negative	Ascl1CreERT2;Tauflox-stop-mGFP-lacZ	103.556	4
Positive	Ascl1CreERT2;Tauflox-stop-mGFP-lacZ	681.778	4		Negative	Ascl1CreERT2;Tauflox-stop-mGFP-lacZ	185.333	4
Positive	Ascl1CreERT2;Tauflox-stop-mGFP-lacZ	675.9	4		Negative	Ascl1CreERT2;Tauflox-stop-mGFP-lacZ	173.333	4
Positive	Ascl1CreERT2;Tauflox-stop-mGFP-lacZ	640.342	4		Negative	Ascl1CreERT2;Tauflox-stop-mGFP-lacZ	119.556	4
Positive	Ascl1CreERT2;Tauflox-stop-mGFP-lacZ	490.998	4		Negative	Ascl1CreERT2;Tauflox-stop-mGFP-lacZ	237.054	4
Positive	Ascl1CreERT2;Tauflox-stop-mGFP-lacZ	507.295	4		Negative	Ascl1CreERT2;Tauflox-stop-mGFP-lacZ	177.494	4
Positive	Ascl1CreERT2;Tauflox-stop-mGFP-lacZ	532.186	4		Negative	Ascl1CreERT2;Tauflox-stop-mGFP-lacZ	195.977	4
Positive	Ascl1CreERT2;Tauflox-stop-mGFP-lacZ	571.596	4		Negative	Ascl1CreERT2;Tauflox-stop-mGFP-lacZ	137.787	4
Positive	Ascl1CreERT2;Tauflox-stop-mGFP-lacZ	316.17	4		Negative	Ascl1CreERT2;Tauflox-stop-mGFP-lacZ	183.124	4
Positive	Ascl1CreERT2;Tauflox-stop-mGFP-lacZ	383.138	4		Negative	Ascl1CreERT2;Tauflox-stop-mGFP-lacZ	176.901	4
					Negative	Ascl1CreERT2;Tauflox-stop-mGFP-lacZ	153.196	4
					Negative	Ascl1CreERT2;Tauflox-stop-mGFP-lacZ	160.604	4
