# Supplementary material for: Purkinje cell neurotransmission patterns cerebellar basket cells into zonal modules defined by distinct pinceau sizes
Source: eLife. 2020 Sep 29;9:e55569. doi: 10.7554/eLife.55569 (PMC7561353; doi:10.7554/eLife.55569)
Supplement: Figure 7—source data 1. [file elife-55569-fig7-data1.xlsx]

## Sheet: Figure 8
FIGURE 8 SOURCE DATA
Panel G
ZebrinII Positive Zone					ZebrinII Negative Zone
ZebrinII?	Genotype	Total Pinceaux Area per 100μm of Zone (µm²)	N (animals)		ZebrinII?	Genotype	Total Pinceaux Area per 100μm of Zone (µm²)	N (animals)
Positive	Control (Slc32a1flox/flox)	81.778	6		Negative	Control (Slc32a1flox/flox)	480.521	6
Positive	Control (Slc32a1flox/flox)	184.444	6		Negative	Control (Slc32a1flox/flox)	329.643	6
Positive	Control (Slc32a1flox/flox)	84	6		Negative	Control (Slc32a1flox/flox)	399.527	6
Positive	Control (Slc32a1flox/flox)	147.556	6		Negative	Control (Slc32a1flox/flox)	440	6
Positive	Control (Slc32a1flox/flox)	68	6		Negative	Control (Slc32a1flox/flox)	359.556	6
Positive	Control (Slc32a1flox/flox)	185.333	6		Negative	Control (Slc32a1flox/flox)	469.778	6
Positive	Control (Slc32a1flox/flox)	157.333	6		Negative	Control (Slc32a1flox/flox)	408.889	6
Positive	Control (Slc32a1flox/flox)	96	6		Negative	Control (Slc32a1flox/flox)	332.889	6
Positive	Control (Slc32a1flox/flox)	152	6		Negative	Control (Slc32a1flox/flox)	524	6
Positive	Control (Slc32a1flox/flox)	96.444	6		Negative	Control (Slc32a1flox/flox)	589.778	6
Positive	Control (Slc32a1flox/flox)	72.55	6		Negative	Control (Slc32a1flox/flox)	457.778	6
Positive	Control (Slc32a1flox/flox)	108.103	6		Negative	Control (Slc32a1flox/flox)	329.778	6
Positive	Control (Slc32a1flox/flox)	152.434	6		Negative	Control (Slc32a1flox/flox)	452.588	6
Positive	Control (Slc32a1flox/flox)	142.656	6		Negative	Control (Slc32a1flox/flox)	587.931	6
Positive	Control (Slc32a1flox/flox)	168.234	6		Negative	Control (Slc32a1flox/flox)	314.467	6
Positive	Control (Slc32a1flox/flox)	84.006	6		Negative	Control (Slc32a1flox/flox)	439.587	6
Positive	Control (Slc32a1flox/flox)	153.789	6		Negative	Control (Slc32a1flox/flox)	660.936	6
Positive	Control (Slc32a1flox/flox)	221.793	6		Negative	Control (Slc32a1flox/flox)	612.044	6
Positive	Control (Slc32a1flox/flox)	90.882	6		Negative	Control (Slc32a1flox/flox)	656.342	6
Positive	Control (Slc32a1flox/flox)	53.929	6		Negative	Control (Slc32a1flox/flox)	467.292	6
Positive	Control (Slc32a1flox/flox)	144.01	6		Negative	Control (Slc32a1flox/flox)	848.06	6
Positive	Control (Slc32a1flox/flox)	91.266	6		Negative	Control (Slc32a1flox/flox)	467.333	6
Positive	Control (Slc32a1flox/flox)	132.454	6		Negative	Control (Slc32a1flox/flox)	344.32	6
Positive	Control (Slc32a1flox/flox)	62.226	6		Negative	Control (Slc32a1flox/flox)	587.004	6
Positive	Control (Slc32a1flox/flox)	120.897	6		Negative	Control (Slc32a1flox/flox)	504.924	6
Positive	Control (Slc32a1flox/flox)	192.902	6
Positive	Mutant (Pcp2Cre;Slc32a1flox/flox)	353.333	4		Negative	Mutant (Pcp2Cre;Slc32a1flox/flox)	234.222	4
Positive	Mutant (Pcp2Cre;Slc32a1flox/flox)	104	4		Negative	Mutant (Pcp2Cre;Slc32a1flox/flox)	200	4
Positive	Mutant (Pcp2Cre;Slc32a1flox/flox)	135.556	4		Negative	Mutant (Pcp2Cre;Slc32a1flox/flox)	319.556	4
Positive	Mutant (Pcp2Cre;Slc32a1flox/flox)	135.556	4		Negative	Mutant (Pcp2Cre;Slc32a1flox/flox)	96.444	4
Positive	Mutant (Pcp2Cre;Slc32a1flox/flox)	216.444	4		Negative	Mutant (Pcp2Cre;Slc32a1flox/flox)	134.222	4
Positive	Mutant (Pcp2Cre;Slc32a1flox/flox)	161.556	4		Negative	Mutant (Pcp2Cre;Slc32a1flox/flox)	107	4
Positive	Mutant (Pcp2Cre;Slc32a1flox/flox)	190.222	4		Negative	Mutant (Pcp2Cre;Slc32a1flox/flox)	184.444	4
Positive	Mutant (Pcp2Cre;Slc32a1flox/flox)	140.889	4		Negative	Mutant (Pcp2Cre;Slc32a1flox/flox)	194.444	4
Positive	Mutant (Pcp2Cre;Slc32a1flox/flox)	255.111	4		Negative	Mutant (Pcp2Cre;Slc32a1flox/flox)	298.222	4
Positive	Mutant (Pcp2Cre;Slc32a1flox/flox)	204	4		Negative	Mutant (Pcp2Cre;Slc32a1flox/flox)	176	4
Positive	Mutant (Pcp2Cre;Slc32a1flox/flox)	78.222	4		Negative	Mutant (Pcp2Cre;Slc32a1flox/flox)	56.444	4
Positive	Mutant (Pcp2Cre;Slc32a1flox/flox)	138.222	4		Negative	Mutant (Pcp2Cre;Slc32a1flox/flox)	273.333	4
Positive	Mutant (Pcp2Cre;Slc32a1flox/flox)	159.196	4		Negative	Mutant (Pcp2Cre;Slc32a1flox/flox)	334.333	4
Positive	Mutant (Pcp2Cre;Slc32a1flox/flox)	113.119	4		Negative	Mutant (Pcp2Cre;Slc32a1flox/flox)	130.602	4
Positive	Mutant (Pcp2Cre;Slc32a1flox/flox)	53.115	4		Negative	Mutant (Pcp2Cre;Slc32a1flox/flox)	82.191	4
Positive	Mutant (Pcp2Cre;Slc32a1flox/flox)	248.166	4		Negative	Mutant (Pcp2Cre;Slc32a1flox/flox)	105.304	4
Positive	Mutant (Pcp2Cre;Slc32a1flox/flox)	255.722	4		Negative	Mutant (Pcp2Cre;Slc32a1flox/flox)	124.453	4
Positive	Mutant (Pcp2Cre;Slc32a1flox/flox)	110.082	4		Negative	Mutant (Pcp2Cre;Slc32a1flox/flox)	226.09	4
Positive	Mutant (Pcp2Cre;Slc32a1flox/flox)	117.342	4		Negative	Mutant (Pcp2Cre;Slc32a1flox/flox)	186.532	4
Positive	Mutant (Pcp2Cre;Slc32a1flox/flox)	160.752	4		Negative	Mutant (Pcp2Cre;Slc32a1flox/flox)	110.378	4
