# Supplementary material for: Purkinje cell neurotransmission patterns cerebellar basket cells into zonal modules defined by distinct pinceau sizes
Source: eLife. 2020 Sep 29;9:e55569. doi: 10.7554/eLife.55569 (PMC7561353; doi:10.7554/eLife.55569)
Supplement: Figure 8—source data 1. [file elife-55569-fig8-data1.xlsx]

## Sheet: Sheet1
FIGURE 8 SOURCE DATA
Panel E Right
ZebrinII Positive Pinceau (LARGE)
ZebrinII Zone Identity	Genotype	Area of ROI in Pixels (1µm²)	Mean Intensity	Raw Density	Integrated Density (Raw Density / Area)	Background Mean Intensity	Mean Total Background Intensity	CTCF Value*	N (animals)
Negative	Control (Slc32a1flox/flox)	9	66.556	599	66.5556	0.75	0.808	59.2836	3
Negative	Control (Slc32a1flox/flox)	9	83.667	753	83.6667	1	0.808	76.3947	3
Negative	Control (Slc32a1flox/flox)	9	78.444	706	78.4444	0.675	0.808	71.1724	3
Negative	Control (Slc32a1flox/flox)	9	82.889	746	82.8889	1.5	0.937	74.4559	3
Negative	Control (Slc32a1flox/flox)	9	84.222	758	84.2222	0.466	0.937	75.7892	3
Negative	Control (Slc32a1flox/flox)	9	75	675	75	0.845	0.937	66.567	3
Negative	Control (Slc32a1flox/flox)	9	75.333	678	75.3333	0.238	0.604	69.8973	3
Negative	Control (Slc32a1flox/flox)	9	81	729	81	1	0.604	75.564	3
Negative	Control (Slc32a1flox/flox)	9	77.889	701	77.8889	0.575	0.604	72.4529	3
Negative	Control (Slc32a1flox/flox)	9	65.556	590	65.5556	0.042	0.439	61.6046	3
Negative	Control (Slc32a1flox/flox)	9	70.333	633	70.3333	0.888	0.439	66.3823	3
Negative	Control (Slc32a1flox/flox)	9	80.899	728	80.8889	0.388	0.439	76.9379	3
ZebrinII Positive Pinceau (SMALL)
ZebrinII Zone Identity	Genotype	Area of ROI in Pixels (1µm²)	Mean Intensity	Raw Density	Integrated Density (Raw Density / Area)	Background Mean Intensity	Mean Total Background Intensity	CTCF Value*	N (animals)
Positive	Control (Slc32a1flox/flox)	9	78.111	703	78.1111	0.75	0.808	70.8391	3
Positive	Control (Slc32a1flox/flox)	9	80.444	724	80.4444	1	0.808	73.1724	3
Positive	Control (Slc32a1flox/flox)	9	80.222	722	80.2222	0.675	0.808	72.9502	3
Positive	Control (Slc32a1flox/flox)	9	65.222	587	65.2222	1.5	0.937	56.7892	3
Positive	Control (Slc32a1flox/flox)	9	64.778	583	64.7778	0.466	0.937	56.3448	3
Positive	Control (Slc32a1flox/flox)	9	73.889	665	73.8889	0.845	0.937	65.4559	3
Positive	Control (Slc32a1flox/flox)	9	81.333	732	81.3333	0.238	0.604	75.8973	3
Positive	Control (Slc32a1flox/flox)	9	66.778	601	66.7778	1	0.604	61.3418	3
Positive	Control (Slc32a1flox/flox)	9	81.111	730	81.1111	0.575	0.604	75.6751	3
Positive	Control (Slc32a1flox/flox)	9	71.778	646	71.7778	0.042	0.439	67.8268	3
Positive	Control (Slc32a1flox/flox)	9	75.333	678	75.3333	0.888	0.439	71.3823	3
Positive	Control (Slc32a1flox/flox)	9	85	765	85	0.388	0.439	81.049	3
*Forumla for Corrected Total Cell Fluorescence (CTCF) value: CTCF = Integrated Density – (Area of ROI × Mean Fluorescence of Background Readings)
ZebrinII Positive Pinceau (LARGE)
ZebrinII Zone Identity	Genotype	Area of ROI in Pixels (1µm²)	Mean Intensity	Raw Density	Integrated Density (Raw Density / Area)	Background Mean Intensity	Mean Total Background Intensity	CTCF Value*	N (animals)
Negative	Mutant (AsclCreERT2;Slc32a1flox/flox)	9	80.778	727	80.7778	0.5	0.574	75.6118	3
Negative	Mutant (AsclCreERT2;Slc32a1flox/flox)	9	83	747	83	1	0.574	77.834	3
Negative	Mutant (AsclCreERT2;Slc32a1flox/flox)	9	81.111	730	81.1111	0.222	0.574	75.9451	3
Negative	Mutant (AsclCreERT2;Slc32a1flox/flox)	9	62.889	566	62.8889	0	0.796	55.7249	3
Negative	Mutant (AsclCreERT2;Slc32a1flox/flox)	9	78.444	706	78.4444	0.388	0.796	71.2804	3
Negative	Mutant (AsclCreERT2;Slc32a1flox/flox)	9	80	720	80	2	0.796	72.836	3
Negative	Mutant (AsclCreERT2;Slc32a1flox/flox)	9	73.556	662	73.5556	0.75	0.664	67.5796	3
Negative	Mutant (AsclCreERT2;Slc32a1flox/flox)	9	81.222	731	81.2222	0.667	0.664	75.2462	3
Negative	Mutant (AsclCreERT2;Slc32a1flox/flox)	9	67	603	67	0.575	0.664	61.024	3
Negative	Mutant (AsclCreERT2;Slc32a1flox/flox)	9	80.667	726	80.6667	0.042	0.458	76.5447	3
Negative	Mutant (AsclCreERT2;Slc32a1flox/flox)	9	71.111	640	71.1111	0.444	0.458	66.9891	3
Negative	Mutant (AsclCreERT2;Slc32a1flox/flox)	9	79.222	713	79.2222	0.889	0.458	75.1002	3
ZebrinII Positive Pinceau (SMALL)
ZebrinII Zone Identity	Genotype	Area of ROI in Pixels (1µm²)	Mean Intensity	Raw Density	Integrated Density (Raw Density / Area)	Background Mean Intensity	Mean Total Background Intensity	CTCF Value*	N (animals)
Positive	Mutant (AsclCreERT2;Slc32a1flox/flox)	9	69.111	622	69.1111	0.5	0.574	63.9451	3
Positive	Mutant (AsclCreERT2;Slc32a1flox/flox)	9	67	603	67	1	0.574	61.834	3
Positive	Mutant (AsclCreERT2;Slc32a1flox/flox)	9	61.222	551	61.2222	0.222	0.574	56.0562	3
Positive	Mutant (AsclCreERT2;Slc32a1flox/flox)	9	80.667	726	80.6667	0	0.796	73.5027	3
Positive	Mutant (AsclCreERT2;Slc32a1flox/flox)	9	77.778	700	77.7778	0.388	0.796	70.6138	3
Positive	Mutant (AsclCreERT2;Slc32a1flox/flox)	9	79.333	714	79.3333	2	0.796	72.1693	3
Positive	Mutant (AsclCreERT2;Slc32a1flox/flox)	9	74.222	668	74.2222	0.75	0.664	68.2462	3
Positive	Mutant (AsclCreERT2;Slc32a1flox/flox)	9	84	756	84	0.667	0.664	78.024	3
Positive	Mutant (AsclCreERT2;Slc32a1flox/flox)	9	76.556	689	76.5556	0.575	0.664	70.5796	3
Positive	Mutant (AsclCreERT2;Slc32a1flox/flox)	9	80.444	724	80.4444	0.042	0.458	76.3224	3
Positive	Mutant (AsclCreERT2;Slc32a1flox/flox)	9	65.889	593	65.8889	0.444	0.458	61.7669	3
Positive	Mutant (AsclCreERT2;Slc32a1flox/flox)	9	76.111	685	76.1111	0.889	0.458	71.9891	3
*Forumla for Corrected Total Cell Fluorescence (CTCF) value: CTCF = Integrated Density – (Area of ROI × Mean Fluorescence of Background Readings)
Panel E Left
ZebrinII Positive Zone					ZebrinII Negative Zone
ZebrinII?	Genotype	Total Pinceaux Area per 100μm of Zone (µm²)	N (animals)		ZebrinII?	Genotype	Total Pinceaux Area per 100μm of Zone (µm²)	N (animals)
Positive	Control (Slc32a1flox/flox)	92.882	3		Negative	Control (Slc32a1flox/flox)	509.297	3
Positive	Control (Slc32a1flox/flox)	127.546	3		Negative	Control (Slc32a1flox/flox)	410.637	3
Positive	Control (Slc32a1flox/flox)	115.992	3		Negative	Control (Slc32a1flox/flox)	347.531	3
Positive	Control (Slc32a1flox/flox)	92.438	3		Negative	Control (Slc32a1flox/flox)	395.972	3
Positive	Control (Slc32a1flox/flox)	74.217	3		Negative	Control (Slc32a1flox/flox)	346.642	3
Positive	Control (Slc32a1flox/flox)	40.886	3		Negative	Control (Slc32a1flox/flox)	334.643	3
Positive	Control (Slc32a1flox/flox)	142.242	3		Negative	Control (Slc32a1flox/flox)	377.751	3
Positive	Control (Slc32a1flox/flox)	163.544	3		Negative	Control (Slc32a1flox/flox)	361.308	3
Positive	Control (Slc32a1flox/flox)	263.222	3		Negative	Control (Slc32a1flox/flox)	581.292	3
Positive	Control (Slc32a1flox/flox)	95.104	3		Negative	Control (Slc32a1flox/flox)	519.593	3
Positive	Control (Slc32a1flox/flox)	207.096	3		Negative	Control (Slc32a1flox/flox)	588.402	3
Positive	Control (Slc32a1flox/flox)	178.654	3		Negative	Control (Slc32a1flox/flox)	504.853	3
Positive	Control (Slc32a1flox/flox)	121.769	3		Negative	Control (Slc32a1flox/flox)	398.194	3
Positive	Control (Slc32a1flox/flox)	72.596	3		Negative	Control (Slc32a1flox/flox)	441.746	3
Positive	Control (Slc32a1flox/flox)	158.211	3		Negative	Control (Slc32a1flox/flox)	353.508	3
Positive	Control (Slc32a1flox/flox)	101.711	3		Negative	Control (Slc32a1flox/flox)	331.087	3
Positive	Control (Slc32a1flox/flox)	71.55	3		Negative	Control (Slc32a1flox/flox)	431.525	3
Positive	Control (Slc32a1flox/flox)	66.622	3		Negative	Control (Slc32a1flox/flox)	537.739	3
Positive	Control (Slc32a1flox/flox)	238.65	3		Negative	Control (Slc32a1flox/flox)	487.076	3
Positive	Control (Slc32a1flox/flox)	123.102	3		Negative	Control (Slc32a1flox/flox)	523.074	3
Positive	Mutant (AsclCreERT2;Slc32a1flox/flox)	134.213	3		Negative	Control (Slc32a1flox/flox)	707.061	3
Positive	Mutant (AsclCreERT2;Slc32a1flox/flox)	123.102	3		Negative	Control (Slc32a1flox/flox)	532.406	3
Positive	Mutant (AsclCreERT2;Slc32a1flox/flox)	82.216	3		Negative	Control (Slc32a1flox/flox)	335.087	3
Positive	Mutant (AsclCreERT2;Slc32a1flox/flox)	91.933	3		Negative	Control (Slc32a1flox/flox)	467.087	3
Positive	Mutant (AsclCreERT2;Slc32a1flox/flox)	171.543	3		Negative	Control (Slc32a1flox/flox)	327.088	3
Positive	Mutant (AsclCreERT2;Slc32a1flox/flox)	109.326	3		Negative	Control (Slc32a1flox/flox)	447.968	3
Positive	Mutant (AsclCreERT2;Slc32a1flox/flox)	132.897	3		Negative	Control (Slc32a1flox/flox)	511.963	3
Positive	Mutant (AsclCreERT2;Slc32a1flox/flox)	155.1	3		Negative	Control (Slc32a1flox/flox)	480.41	3
Positive	Mutant (AsclCreERT2;Slc32a1flox/flox)	116.436	3		Negative	Control (Slc32a1flox/flox)	352.864	3
Positive	Mutant (AsclCreERT2;Slc32a1flox/flox)	206.207	3		Negative	Control (Slc32a1flox/flox)	576.403	3
Positive	Mutant (AsclCreERT2;Slc32a1flox/flox)	170.21	3		Negative	Control (Slc32a1flox/flox)	396.861	3
Positive	Mutant (AsclCreERT2;Slc32a1flox/flox)	131.325	3		Negative	Control (Slc32a1flox/flox)	494.187	3
Positive	Mutant (AsclCreERT2;Slc32a1flox/flox)	182.654	3		Negative	Control (Slc32a1flox/flox)	543.517	3
Positive	Mutant (AsclCreERT2;Slc32a1flox/flox)	87.105	3		Negative	Control (Slc32a1flox/flox)	311.533	3
Positive	Mutant (AsclCreERT2;Slc32a1flox/flox)	85.722	3		Negative	Control (Slc32a1flox/flox)	352.864	3
Positive	Mutant (AsclCreERT2;Slc32a1flox/flox)	195.542	3		Negative	Control (Slc32a1flox/flox)	382.195	3
Positive	Mutant (AsclCreERT2;Slc32a1flox/flox)	151.1	3		Negative	Control (Slc32a1flox/flox)	525.74	3
Positive	Mutant (AsclCreERT2;Slc32a1flox/flox)	180.432	3		Negative	Control (Slc32a1flox/flox)	280.869	3
Positive	Mutant (AsclCreERT2;Slc32a1flox/flox)	141.323	3		Negative	Control (Slc32a1flox/flox)	548.405	3
Positive	Mutant (AsclCreERT2;Slc32a1flox/flox)	163.099	3		Negative	Control (Slc32a1flox/flox)	301.312	3
